# Supplementary material for: Photoinduced electron transfer in a supramolecular triad produced by porphyrin anion-induced electron transfer from tetrathiafulvalene calix[4]pyrrole to Li+@C60
Source: Royal Society of Chemistry journal article supplement (doi:10.1039/c5cc03061g), 2015-01-01
Supplement: c5cc03061g1.pdf [file c5cc03061g1.pdf]

Electronic supplementary information

**Photoinduced electron transfer in a supramolecular  
triad produced by porphyrin anion-induced electron  
transfer from tetrathiafulvalene calix[4]pyrrole to  
 $\text{Li}^+@C_{60}$**

Christina M. Davis,<sup>a</sup> Kei Ohkubo,<sup>bc</sup> Aaron D. Lammer,<sup>a</sup> Dong Sub Kim,<sup>a</sup> Yuki Kawashima,<sup>b</sup> Jonathan L. Sessler<sup>\*a</sup> and Shunichi Fukuzumi<sup>\*bcd</sup>

<sup>a</sup> *Department of Chemistry, 105 E. 24<sup>th</sup> Street-Stop A5300, The University of Texas, Austin, Texas, 78712-1224, USA;*

<sup>b</sup> *Department of Material and Life Science, Graduate School of Engineering, Osaka University and ALCA and SENTAN, Japan Science and Technology Agency (JST), 2-1 Yamada-oka, Suita, Osaka 565-0871, Japan.*

<sup>c</sup> *Department of Bioinspired Science, Ewha Womans University, Seoul 120-750, Korea*

<sup>d</sup> *Faculty of Science and Technology, Meijo University and ALCA and SENTAN, Japan Science and Technology Agency (JST), Shiogamaguchi, Tempaku, Nagoya, Aichi 468-8502, Japan*

**E-mail:** fukuzumi@chem.eng.osaka-u.ac.jp; sessler@mail.utexas.edu

**Synthetic experimental.** General chemicals were purchased from commercial sources and used without further purification. Benzonitrile was distilled over phosphorous pentaoxide prior to use unless otherwise noted. The benzoannulated tetrathiafulvalene calix[4]pyrrole used in this study was synthesized as previously reported.<sup>1</sup> The porphyrin used to prepare salt **1**, 4-(10,15,20-triphenylporphyrin-5-yl) benzoic acid, was prepared by use of modified literature procedures.<sup>2</sup> First, benzoic acid, 4-(10,15,20-triphenyl-21*H*,23*H*-porphin-5-yl)-, methyl ester was prepared by modifying a previously reported synthesis.<sup>2a</sup> Briefly, 1,9-*bis*-benzoyl-5-phenyldipyrromethane (430 mg, 1 mmol) was dissolved in 15 mL THF:MeOH (10:1). NaBH<sub>4</sub> was added, and solution was stirred for 30 min at room temperature. The solution was then poured into sat. NH<sub>4</sub>Cl and extracted with 80 mL CH<sub>2</sub>Cl<sub>2</sub>. The extract was dried over Na<sub>2</sub>SO<sub>4</sub>, filtered, and concentrated under reduced pressure. The resulting residue was dissolved in 360 mL MeCN. 4-Methylcarboxyphenyldipyrromethane (190 mg, 1 equiv) was added, followed by 1 mL of TFA added drop-wise. The resulting solution was stirred for 5 min. DDQ (60 mg) was added and the solution was stirred for an hour. The solution was concentrated under vacuum, and the resulting residue was purified by column chromatography over silica gel to give the desired product in 11% yield. NMR, MS, and UV data matched the literature values. From the ester, benzoic acid, 4-(10, 15, 20-triphenyl-21*H*,23*H*-porphin-5-yl) was prepared using conditions detailed in the literature.<sup>2b</sup> The desired compound was isolated in 74% yield and analysis gave values that matched the reported spectroscopic data. The carboxylic acid proton was exchanged for the tetrahexylammonium cation by partitioning between a dichloromethane layer containing tetrahexylammonium chloride and an aqueous sodium hydroxide layer. This gave **1**.

**Laser flash photolysis measurements.** Nanosecond transient absorption spectral measurements were made according to the following procedure. A deaerated solution of **1**, TTF-C4P and Li<sup>+</sup>@C<sub>60</sub> was excited by an Nd:YAG laser (Continuum, SLII-10, 4-6 ns fwhm) at 532 nm. The resulting time resolved transient absorption spectra were measured by using a continuous Xe-lamp (150 W) and a photodiode (Hamamatsu 2949) as the probe light and detector, respectively. The output from the photodiode and the photomultiplier tube was recorded using a digitizing oscilloscope (Tektronix, TDS3032, 300 MHz). The solutions were deoxygenated by N<sub>2</sub> purging for 10 min prior to making

the measurements. Rates of photoinduced electron-transfer reactions were monitored by the rise and decay of the absorption band due to the TTF-C4P radical anion. First-order rate constants were determined by a least-squares curve fit. All experiments were performed at 298 K.

## References

1. J. S. Park, F. Le Derf, C. M. Bejger, V. M. Lynch, J. L. Sessler, K. A. Nielsen, C. Johnsen, J. O. Jeppesen, *Chem.–Eur. J.*, 2010, **16**, 848-854.
2. (a) P. D. Rao, S. Dhanalekshmi, B. J. Littler, and J. S. Lindsey. *J. Org. Chem.* 2000, **65**, 7323-7344. (b) M. Stefanelli, D. Monti, V. Van Axel Castelli, G. Ercolani, M. Venanzi, G. Pomarico and R. Paolesse, *J. Porphyrins Phthalocyanines*, 2008, **12**, 1279.
